# Supplementary material
Source: PubMed Central journal article supplement (PMC7936051)
Supplement: djaa107_supplementary_data.pdf [file djaa107_supplementary_data.pdf]

## Supplementary Materials

**Supplementary Table 1. Sensitivity analysis restricting cohort to patients treated post-2009, N=342\***

| Sociodemographic Characteristics                                    | Multivariable Analyses of Outcome                  |            |                                                    |              |
|---------------------------------------------------------------------|----------------------------------------------------|------------|----------------------------------------------------|--------------|
|                                                                     | Event-Free Survival                                |            | Overall Survival                                   |              |
|                                                                     | HR (95% CI)                                        | P-value    | HR (95% CI)                                        | P-value      |
| Neighborhood-poverty<br>No (Q2-4: >\$35,916)<br>Yes (Q1:<=\$35,916) | 1.00 (Ref)<br>1.15 (0.76-1.74)                     | .50        | 1.00 (Ref)<br>1.26 (0.75-2.12)                     | .38          |
| Household-Poverty<br>No<br>Yes                                      | 1.00 (Ref)<br>1.94 (1.31-2.88)                     | <.001      | 1.00 (Ref)<br>3.17 (1.84-5.46)                     | <.001        |
| Ethnicity<br>Non-Hispanic<br>Hispanic                               | 1.00 (Ref)<br>1.12 (0.72-1.75)                     | .61        | 1.00 (Ref)<br>1.50 (0.77-2.92)                     | .23          |
| Tumor and Treatment Characteristics                                 |                                                    |            |                                                    |              |
| INSS Stage<br>2B/3/4S<br>Stage 4<br>Unknown Stage                   | 1.00 (Ref)<br>1.39 (0.76-2.55)<br>1.90 (0.74-4.85) | .29<br>.18 | 1.00 (Ref)<br>1.17 (0.41-3.34)<br>2.04 (0.47-8.85) | .77<br>.34   |
| Tumor <i>MYCN</i><br>Not amplified<br>Amplified<br>Unknown          | 1.00 (Ref)<br>0.74 (0.48-1.16)<br>1 (0.52-1.92)    | .19<br>1.0 | 1.00 (Ref)<br>0.97 (0.46-2.07)<br>1.37 (0.54-3.46) | .94<br>.51   |
| End-induction disease response<br>CR<br>VGPR<br>PR                  | 1.00 (Ref)<br>1.61 (0.97-2.67)<br>1.43 (0.75-2.76) | .07<br>.28 | 1.00 (Ref)<br>2.63 (1.02-6.76)<br>2.52 (1.36-4.65) | .003<br>.045 |

\* Results of multivariable analyses of EFS and OS from time of trial enrollment adjusting for ethnicity, insurance, INSS stage, disease response, *MYCN* and hospital clustering.

**Supplementary Table 2. Sensitivity analysis censoring analytic cohort at 2-years, N=371\***

|                                     | Multivariable Analyses of Outcome |         |                  |         |
|-------------------------------------|-----------------------------------|---------|------------------|---------|
|                                     | Event-Free Survival               |         | Overall Survival |         |
| Sociodemographic Characteristics    | HR (95% CI)                       | P-value | HR (95% CI)      | P-value |
| Neighborhood-poverty                |                                   |         |                  |         |
| No (Q2-4: >\$35,916)                | 1.00 (Ref)                        |         | 1.00 (Ref)       |         |
| Yes (Q1:<=\$35,916)                 | 1.16 (0.76-1.77)                  | .50     | 1.43 (0.89-2.31) | .14     |
| Household-Poverty                   |                                   |         |                  |         |
| No                                  | 1.00 (Ref)                        |         | 1.00 (Ref)       |         |
| Yes                                 | 1.91 (1.27-2.89)                  | .002    | 2.78 (1.54-5.00) | <.001   |
| Ethnicity                           |                                   |         |                  |         |
| Non-Hispanic                        | 1.00 (Ref)                        |         | 1.00 (Ref)       |         |
| Hispanic                            | 1.31 (0.84-2.03)                  | .23     | 1.93 (0.97-3.85) | .06     |
| Tumor and Treatment Characteristics |                                   |         |                  |         |
| INSS Stage                          |                                   |         |                  |         |
| 2B/3/4S                             | 1.00 (Ref)                        | 0.04    | 1.00 (Ref)       |         |
| Stage 4                             | 2.16 (1.05-4.42)                  | .04     | 0.94 (0.32-2.71) | .90     |
| Unknown Stage                       | 4.45 (1.09-18.15)                 |         | 2.81 (0.51-15.6) | .24     |
| Tumor <i>MYCN</i>                   |                                   |         |                  |         |
| Not amplified                       | 1.00 (Ref)                        |         | 1.00 (Ref)       |         |
| Amplified                           | 0.90 (0.63-1.29)                  | .58     | 1.10 (0.56-2.15) | .78     |
| Unknown                             | 0.73 (0.26-2.03)                  | .54     | 0.99 (0.24-4.11) | .99     |
| End-induction disease response      |                                   |         |                  |         |
| CR                                  | 1.00 (Ref)                        |         | 1.00 (Ref)       |         |
| VGPR                                | 1.69 (1.01-2.84)                  | .047    | 2.51 (1.16-5.42) | .02     |
| PR                                  | 1.4 (0.71-2.77)                   | .33     | 2.95 (1.24-7.02) | .02     |

\* Results of multivariable analyses of EFS and OS from time of trial enrollment adjusting for ethnicity, insurance, INSS stage, disease response, *MYCN* and hospital clustering.

**Supplementary Table 3. Sensitivity analysis expanding cohort to include N=14 patients with missing end-induction disease status and assigning them VGPR disease status, N=385\***

| Sociodemographic Characteristics                                    | Multivariable Analyses of Outcome                  |            |                                                     |            |
|---------------------------------------------------------------------|----------------------------------------------------|------------|-----------------------------------------------------|------------|
|                                                                     | Event-Free Survival                                |            | Overall Survival                                    |            |
|                                                                     | HR (95% CI)                                        | P-value    | HR (95% CI)                                         | P-value    |
| Neighborhood-poverty<br>No (Q2-4: >\$35,916)<br>Yes (Q1:<=\$35,916) | 1.00 (Ref)<br>1.11 (0.76-1.64)                     | .59        | 1.00 (Ref)<br>1.20 (0.75-1.90)                      | .45        |
| Household-Poverty<br>No<br>Yes                                      | 1.00 (Ref)<br>1.96 (1.35-2.84)                     | <.001      | 1.00 (Ref)<br>3.06 (1.88-4.97)                      | <.001      |
| Ethnicity<br>Non-Hispanic<br>Hispanic                               | 1.00 (Ref)<br>1.25 (0.82-1.89)                     | .30        | 1.00 (Ref)<br>1.55 (0.86-2.79)                      | .15        |
| Tumor and Treatment Characteristics                                 |                                                    |            |                                                     |            |
| INSS Stage<br>2B/3/4S<br>Stage 4<br>Unknown Stage                   | 1.00 (Ref)<br>1.42 (0.71-2.85)<br>1.91 (0.63-5.77) | .32<br>.25 | 1.00 (Ref)<br>1.83 (0.75-4.46)<br>3.54 (0.90-13.97) | .19<br>.07 |
| Tumor <i>MYCN</i><br>Not amplified<br>Amplified<br>Unknown          | 1.00 (Ref)<br>0.73 (0.51-1.05)<br>0.97 (0.50-1.88) | .73<br>.97 | 1.00 (Ref)<br>0.93 (0.50-1.72)<br>1.01 (0.43-2.36)  | .81<br>.99 |
| End-induction disease response<br>CR<br>VGPR<br>PR                  | 1.00 (Ref)<br>1.78 (1.14-2.78)<br>1.46 (0.73-2.90) | .01<br>.28 | 1.00 (Ref)<br>1.99 (1.09-3.64)<br>2.21 (0.89-5.52)  | .03<br>.09 |

\* Results of multivariable analyses of EFS and OS from time of trial enrollment adjusting for ethnicity, insurance, INSS stage, disease response, *MYCN* and hospital clustering.

**Supplementary Table 4. Sensitivity analysis expanding cohort to include N=14 patients with missing end-induction disease status and assigning them PR disease status, N=385\***

|                                     | Multivariable Analyses of Outcome            |                                                    |                  |                                                     |            |
|-------------------------------------|----------------------------------------------|----------------------------------------------------|------------------|-----------------------------------------------------|------------|
|                                     | Event-Free Survival                          |                                                    | Overall Survival |                                                     |            |
| Sociodemographic Characteristics    | HR (95% CI)                                  | P-value                                            | HR (95% CI)      | P-value                                             |            |
| Neighborhood-poverty                | No (Q2-4: >\$35,916)<br>Yes (Q1: <=\$35,916) | 1.00 (Ref)<br>1.12 (0.77-1.63)                     | .55              | 1.00 (Ref)<br>1.21 (0.77-1.91)                      | .41        |
| Household-Poverty                   | No<br>Yes                                    | 1.00 (Ref)<br>1.97 (1.35-2.86)                     | <.001            | 1.00 (Ref)<br>3.01 (1.86-4.88)                      | <.001      |
| Ethnicity                           | Non-Hispanic<br>Hispanic                     | 1.00 (Ref)<br>1.22 (0.82-1.82)                     | .32              | 1.00 (Ref)<br>1.54 (0.85-2.78)                      | .15        |
| Tumor and Treatment Characteristics |                                              |                                                    |                  |                                                     |            |
| INSS Stage                          | 2B/3/4S<br>Stage 4<br>Unknown Stage          | 1.00 (Ref)<br>1.41 (0.70-2.84)<br>1.96 (0.64-6.00) | .34<br>.24       | 1.00 (Ref)<br>1.85 (0.76-4.50)<br>3.69 (0.92-14.82) | .18<br>.07 |
| Tumor <i>MYCN</i>                   | Not amplified<br>Amplified<br>Unknown        | 1.00 (Ref)<br>0.75 (0.53-1.07)<br>0.95 (0.49-1.86) | .12<br>.88       | 1.00 (Ref)<br>0.95 (0.50-1.78)<br>1.00 (0.43-2.32)  | .86<br>1.0 |
| End-induction disease response      | CR<br>VGPR<br>PR                             | 1.00 (Ref)<br>1.59 (0.96-2.64)<br>1.67 (0.93-2.99) | .07<br>.08       | 1.00 (Ref)<br>1.87 (0.97-3.60)<br>2.28 (0.99-5.26)  | .06<br>.05 |

\*Results of multivariable analyses of EFS and OS adjusting for ethnicity, insurance, INSS stage, disease response, *MYCN* and hospital clustering.

**Supplementary Table 5. Sensitivity analysis recategorizing the N=55 patients in the analytic cohort with unknown INSS Stage to Stage 4 disease, N=371\***

|                                            | Multivariable Analyses of Outcome |         |                  |         |
|--------------------------------------------|-----------------------------------|---------|------------------|---------|
|                                            | Event-Free Survival               |         | Overall Survival |         |
|                                            | HR (95% CI)                       | P-value | HR (95% CI)      | P-value |
| <b>Sociodemographic Characteristics</b>    |                                   |         |                  |         |
| Neighborhood-poverty                       |                                   |         |                  |         |
| No (Q2-4: >\$35,916)                       | 1.00 (Ref)                        |         | 1.00 (Ref)       |         |
| Yes (Q1:<=\$35,916)                        | 1.13 (0.78-1.63)                  | .53     | 1.14 (0.73-1.78) | .56     |
| Household-Poverty                          |                                   |         |                  |         |
| No                                         | 1.00 (Ref)                        |         | 1.00 (Ref)       |         |
| Yes                                        | 1.88 (1.26-2.79)                  | .002    | 2.68 (1.54-4.68) | <.001   |
| Ethnicity                                  |                                   |         |                  |         |
| Non-Hispanic                               | 1.00 (Ref)                        |         | 1.00 (Ref)       |         |
| Hispanic                                   | 1.21 (0.80-1.84)                  | .37     | 1.70 (0.92-3.15) | .09     |
| <b>Tumor and Treatment Characteristics</b> |                                   |         |                  |         |
| <b>INSS Stage</b>                          |                                   |         |                  |         |
| 2B/3/4S                                    | 1.00 (Ref)                        |         | 1.00 (Ref)       |         |
| Stage 4                                    | 1.55 (0.85-2.80)                  | .15     | 1.56 (0.56-4.33) | .39     |
| Tumor <i>MYCN</i>                          |                                   |         |                  |         |
| Not amplified                              | 1.00 (Ref)                        |         | 1.00 (Ref)       |         |
| Amplified                                  | 0.77 (0.54-1.09)                  | .14     | 1.0 (0.56-1.80)  | 1.0     |
| Unknown                                    | 1.20 (0.72-2.00)                  | .49     | 1.51 (0.75-3.03) | .24     |
| End-induction disease response             |                                   |         |                  |         |
| CR                                         | 1.00 (Ref)                        |         | 1.00 (Ref)       |         |
| VGPR                                       | 1.61 (0.95-2.75)                  | .08     | 1.92 (1.02-3.61) | .04     |
| PR                                         | 1.46 (0.74-2.90)                  | .27     | 2.24 (0.95-5.29) | .07     |

\* Results of multivariable analyses of EFS and OS adjusting for ethnicity, insurance, INSS stage, disease response, *MYCN* and hospital clustering.
